# Supplementary material
Source: PubMed Central journal article supplement (PMC10083895)
Supplement: NIHMS1885668-supplement-2.pdf [file NIHMS1885668-supplement-2.pdf]

## Appendix

Supplemental Table 1

Comparison of characteristics among participants with and without missing CVH metrics and depression scores, NHANES 2007–2014

| Characteristics               | Overall (n = 17,131) | CVH metrics or depression score |                          | P value |
|-------------------------------|----------------------|---------------------------------|--------------------------|---------|
|                               |                      | Missing (n = 2570)              | Not missing (n = 14,561) |         |
| Age, y (mean, SE)             | 44.4 (0.30)          | 43.2 (0.52)                     | 44.6 (0.31)              | .012    |
| Female (% , SE)               | 51.2 (0.52)          | 56.3 (1.31)                     | 50.4 (0.54)              | <.001   |
| Race/ethnicity (% , SE)       |                      |                                 |                          |         |
| Non-Hispanic whites           | 66.6 (1.85)          | 56.7 (2.27)                     | 66.9 (1.85)              | <.001   |
| Non-Hispanic blacks           | 11.8 (0.91)          | 17.2 (1.36)                     | 11.0 (0.87)              | <.001   |
| Mexican American              | 9.4 (0.98)           | 9.1 (1.20)                      | 9.4 (1.00)               | .732    |
| Other                         | 13.3 (0.70)          | 17.1 (0.86)                     | 12.7 (0.79)              | <.001   |
| Heavy use of alcohol (% , SE) | 9.6 (0.39)           | 11.2 (1.28)                     | 9.5 (0.39)               | .194    |
| Education (% , SE)            |                      |                                 |                          |         |
| <12 y                         | 17.1 (0.78)          | 21.9 (1.32)                     | 16.4 (0.79)              | <.001   |
| 12 y                          | 22.7 (0.71)          | 24.9 (1.18)                     | 22.3 (0.79)              | .065    |
| >12 y                         | 60.2 (1.21)          | 53.2 (1.67)                     | 61.3 (1.29)              | <.001   |

Supplemental Table 2

Adjusted prevalence ratios and 95% confidence intervals for mild and moderate/severe depression associated with CVH metrics including participants with history of CVD and cancer, NHANES 2007–2014 (n = 17,512) <sup>a,†</sup>

| Health metrics                | Optimum CVH | Average CVH      | Inadequate CVH   |
|-------------------------------|-------------|------------------|------------------|
| Moderate/severe depression    | 1.00        | 2.46 (2.03–2.98) | 4.55 (3.57–5.81) |
| Mild depression               | 1.00        | 1.37 (1.21–1.56) | 1.95 (1.66–2.38) |
| Number of health behaviors    |             |                  |                  |
| Health behaviors <sup>‡</sup> | 3–4         | 2                | 0–1              |
| Moderate/severe depression    | 1.00        | 2.54 (1.54–4.21) | 4.96 (3.11–7.91) |
| Mild depression               | 1.00        | 1.29 (1.04–1.61) | 1.80 (1.46–2.61) |
| Number of health factors      |             |                  |                  |
| Health factors <sup>§</sup>   | 3           | 2                | 0–1              |
| Moderate/severe depression    | 1.00        | 1.28 (1.01–1.61) | 1.17 (0.94–1.46) |
| Mild depression               | 1.00        | 1.01 (0.89–1.15) | 1.17 (0.99–1.39) |

<sup>a</sup> Optimum CVH: CVH metrics scores 10–14; Average CVH: CVH metrics scores 5–9; Inadequate CVH: CV health metrics scores 0–4.<sup>†</sup> Adjusted for age, gender, race/ethnicity, education, alcohol use, and history of CVD and cancer.<sup>‡</sup> Health behaviors include body mass index, smoking, physical activity, and dietary intake.<sup>§</sup> Health factors include total cholesterol, blood pressure and fasting glucose.

**Supplemental Table 3**

Adjusted prevalence ratios and 95% confidence intervals for mild and moderate/severe depression associated with CVH metrics including participants with history of CVD and cancer, by selected subgroups, NHANES 2007–2014 ( $n = 17,512$ )<sup>†</sup>

| Characteristics                    | Ideal CVH | Intermediate CVH | Poor CVH         |
|------------------------------------|-----------|------------------|------------------|
| <b>Age</b>                         |           |                  |                  |
| 20–44 y ( $n = 7338$ )             |           |                  |                  |
| Moderate/severe depression         | 1.00      | 2.77 (2.19–3.51) | 4.64 (3.34–6.44) |
| Mild depression                    | 1.00      | 1.24 (1.06–1.44) | 1.85 (1.38–2.48) |
| 45–64 y ( $n = 6156$ )             |           |                  |                  |
| Moderate/severe depression         | 1.00      | 1.76 (1.18–2.61) | 3.14 (2.05–4.80) |
| Mild depression                    | 1.00      | 1.70 (1.24–2.32) | 2.70 (1.89–3.85) |
| ≥65 y ( $n = 4018$ )               |           |                  |                  |
| Moderate/severe depression         | 1.00      | 1.86 (0.93–3.74) | 3.23 (1.51–6.89) |
| Mild depression                    | 1.00      | 1.47 (1.12–1.93) | 1.41 (0.91–2.20) |
| <b>Gender</b>                      |           |                  |                  |
| Male ( $n = 8813$ )                |           |                  |                  |
| Moderate/severe depression         | 1.00      | 2.15 (1.49–3.12) | 3.11 (2.10–4.61) |
| Mild depression                    | 1.00      | 1.33 (1.09–1.63) | 1.87 (1.43–2.45) |
| Female ( $n = 8699$ )              |           |                  |                  |
| Moderate/severe depression         | 1.00      | 2.64 (2.08–3.35) | 5.55 (4.09–7.54) |
| Mild depression                    | 1.00      | 1.38 (1.19–1.60) | 1.98 (1.57–2.51) |
| <b>Race/ethnicity</b>              |           |                  |                  |
| Non-Hispanic whites ( $n = 8109$ ) |           |                  |                  |
| Moderate/severe depression         | 1.00      | 2.53 (1.87–3.41) | 4.49 (3.09–6.54) |
| Mild depression                    | 1.00      | 1.41 (1.22–1.63) | 2.29 (1.92–2.73) |
| Non-Hispanic blacks ( $n = 3484$ ) |           |                  |                  |
| Moderate/severe depression         | 1.00      | 1.35 (1.01–1.81) | 2.76 (1.92–3.97) |
| Mild depression                    | 1.00      | 1.31 (0.99–1.73) | 1.41 (0.99–1.99) |
| Mexican Americans ( $n = 2651$ )   |           |                  |                  |
| Moderate/severe depression         | 1.00      | 3.09 (1.72–5.53) | 4.61 (2.33–9.12) |
| Mild depression                    | 1.00      | 0.96 (0.69–1.32) | 1.03 (0.66–1.59) |
| Other ( $n = 3268$ )               |           |                  |                  |
| Moderate/severe depression         | 1.00      | 2.73 (1.93–3.86) | 5.47 (3.48–8.60) |
| Mild depression                    | 1.00      | 1.53 (1.10–2.13) | 1.60 (0.91–2.81) |
| <b>Education</b>                   |           |                  |                  |
| <12 y ( $n = 4316$ )               |           |                  |                  |
| Moderate/severe depression         | 1.00      | 2.22 (1.58–3.14) | 3.67 (2.56–5.27) |
| Mild depression                    | 1.00      | 1.15 (0.79–1.66) | 1.52 (0.95–2.43) |
| 12 y ( $n = 4005$ )                |           |                  |                  |
| Moderate/severe depression         | 1.00      | 1.84 (1.09–3.10) | 3.28 (1.76–6.11) |
| Mild depression                    | 1.00      | 1.20 (0.90–1.60) | 1.91 (1.34–2.72) |
| >12 y ( $n = 9191$ )               |           |                  |                  |
| Moderate/severe depression         | 1.00      | 2.79 (2.79–3.62) | 5.71 (3.91–8.34) |
| Mild depression                    | 1.00      | 1.48 (1.25–1.76) | 2.02 (1.66–2.52) |

\* Optimum CVH: CVH metrics scores 10–14; Average CVH: CVH metrics scores 5–9; Inadequate CVH: CV health metrics scores 0–4.

† Adjusted for age, gender, race/ethnicity, education, alcohol use, and history of CVD and cancer.
